# Supplementary material for: Maximizing pore and heteroatom utilization within N,P-co-doped polypyrrole-derived carbon nanotubes for high-performance supercapacitors
Source: Royal Society of Chemistry journal article supplement (doi:10.1039/d0ta06238c), 2020-01-01
Supplement: d0ta06238c1.pdf [file d0ta06238c1.pdf]

## Supporting Information for

### **Maximizing Pore and Heteroatom Utilization within N, P Co-doped Polypyrrole-derived Carbon Nanotubes for High-performance Supercapacitors**

Xinying Luo<sup>a‡</sup>, Qi Yang<sup>b‡</sup>, Yanli Dong<sup>a</sup>, Xiaoxiong Huang<sup>b</sup>, Debin Kong<sup>b</sup>, Bin Wang<sup>b</sup>,  
Huimin Liu<sup>a</sup>, Zhichang Xiao<sup>a\*</sup> and Linjie Zhi<sup>b</sup>

<sup>a</sup> Department of Chemistry, College of Science, Hebei Agricultural University, Baoding 071001, People's Republic of China

<sup>b</sup> CAS Key Laboratory of Nanosystem and Hierarchical Fabrication, CAS Center for Excellence in Nanoscience, National Center for Nanoscience and Technology, Beijing 100190, People's Republic of China

<sup>‡</sup>These authors contributed equally to this work.

\*Corresponding author. Email: xiaozhichangcnu@sina.cn

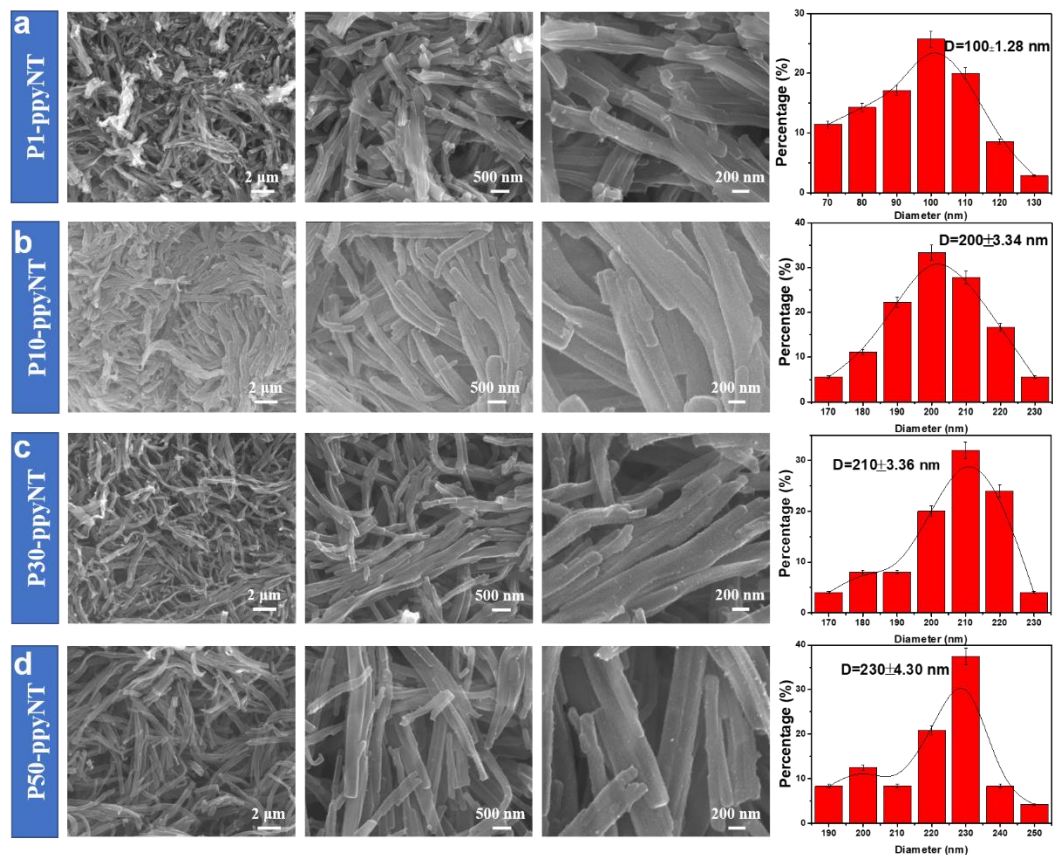

Figure S1. SEM images and diameter count of (a) P1-ppyNT, (b) P10-ppyNT, (c) P30-ppyNT and (d) P50-ppyNT.

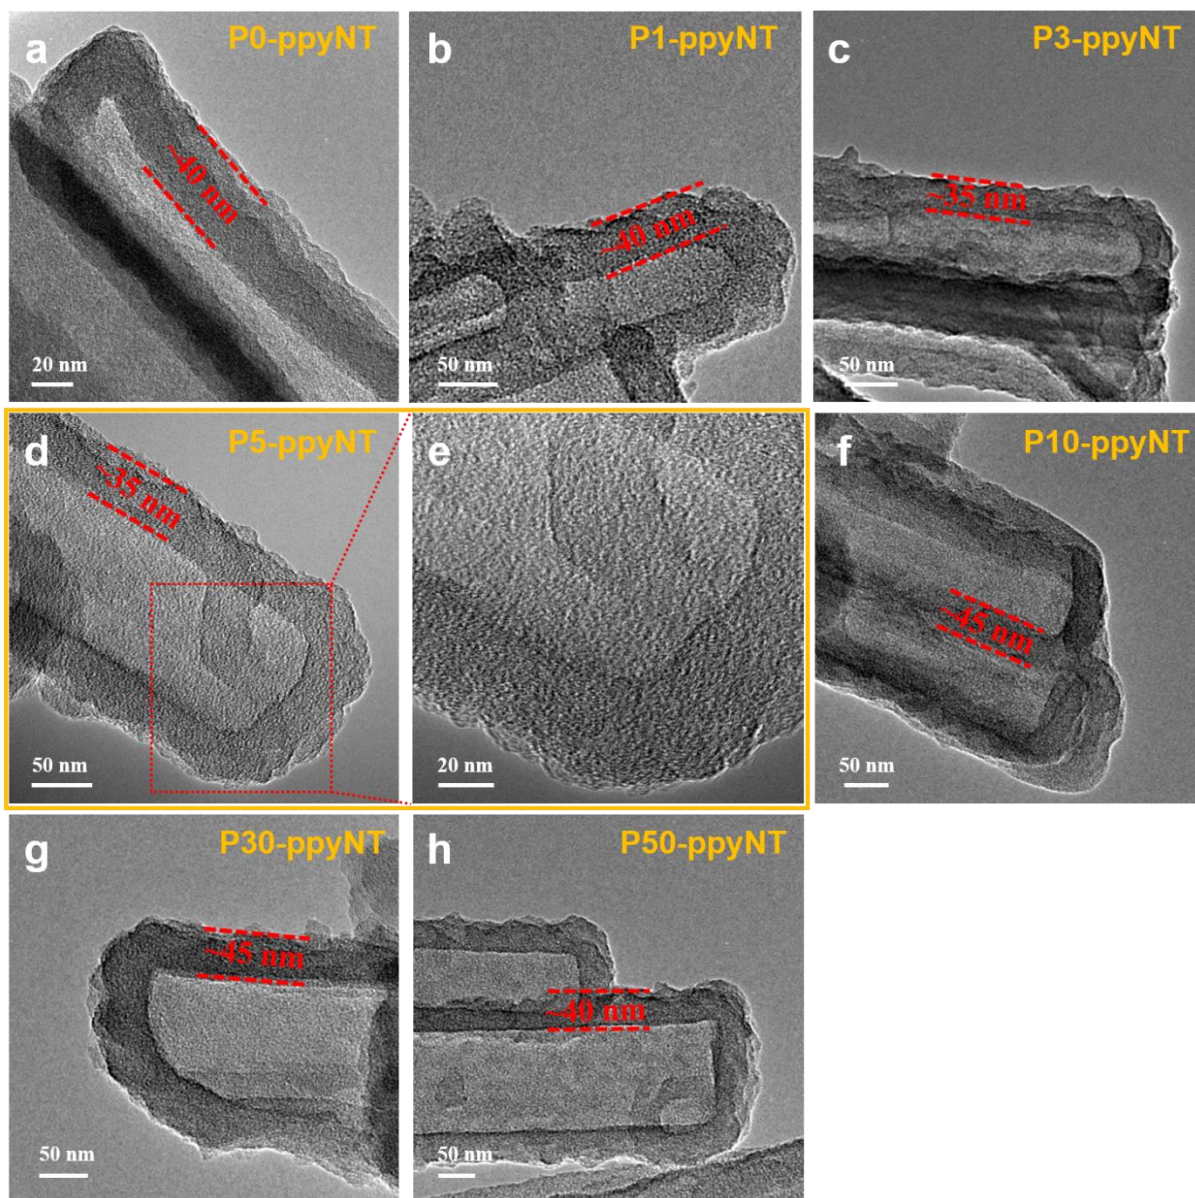

Figure S2. TEM analysis for wall thickness and hollow cavity of (a) P0-ppyNT; (b) P1-ppyNT; (c) P3-ppyNT (d) P5-ppyNT and (e) corresponding high-resolution TEM image; (f) P10-ppyNT; (g) P30-ppyNT; (h) P50-ppyNT.

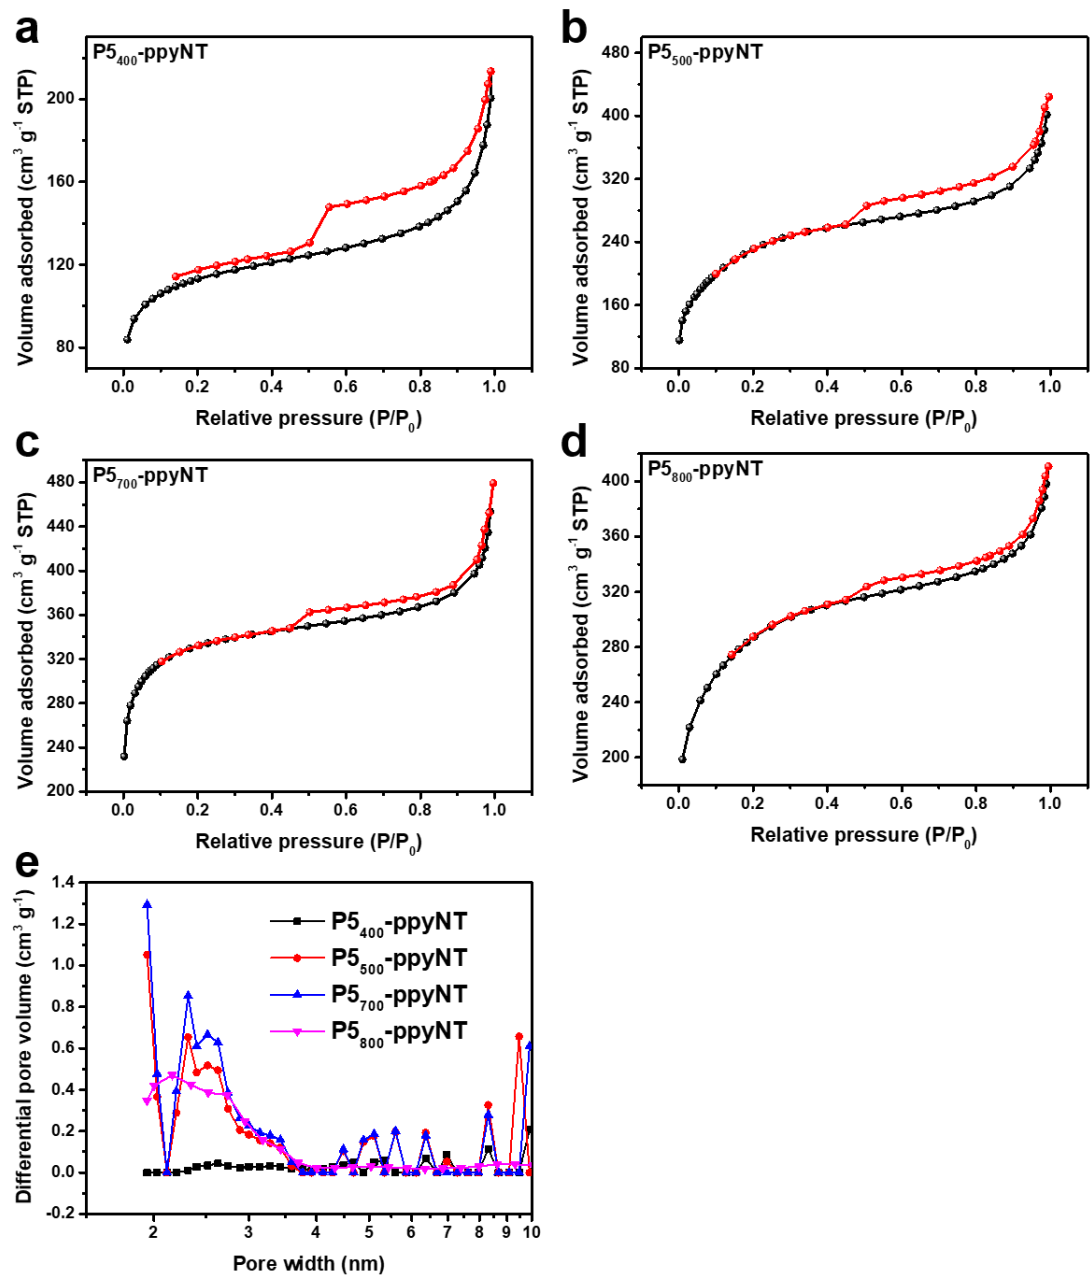

Figure S3. N<sub>2</sub> adsorption/desorption isotherms of (a) P5<sub>400</sub>-ppyNT; (b) P5<sub>500</sub>-ppyNT; (c) P5<sub>700</sub>-ppyNT; (d) P5<sub>800</sub>-ppyNT and (e) the related pore size distribution curves.

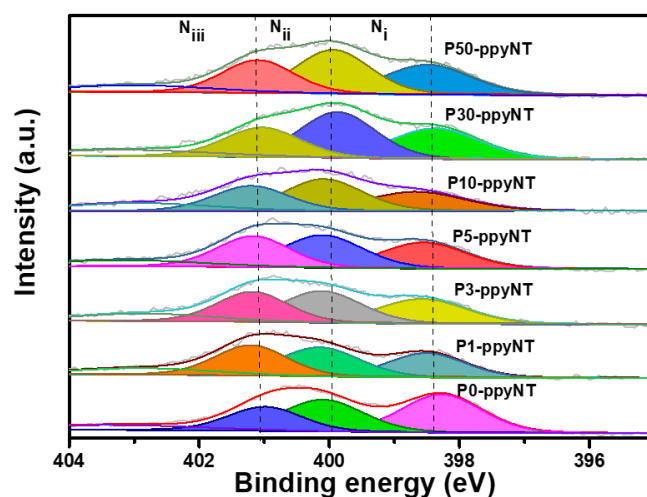

Figure S4. High-resolution N 1s spectra of Px-ppyNT samples.

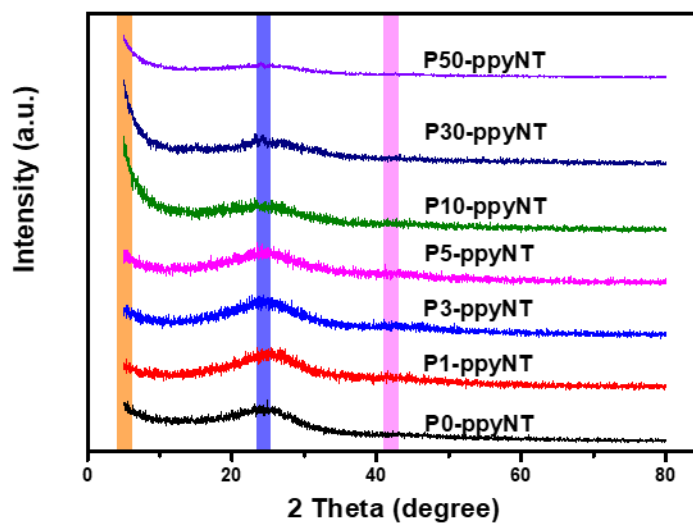

Figure S5. XRD patterns of Px-ppyNT samples. The three bands at  $\sim 5^\circ$ ,  $\sim 24.2^\circ$  and  $\sim 43^\circ$  represent the preserved porous structure after thermalization, stacked graphitic-like systems and in-plane aromatic systems, respectively.

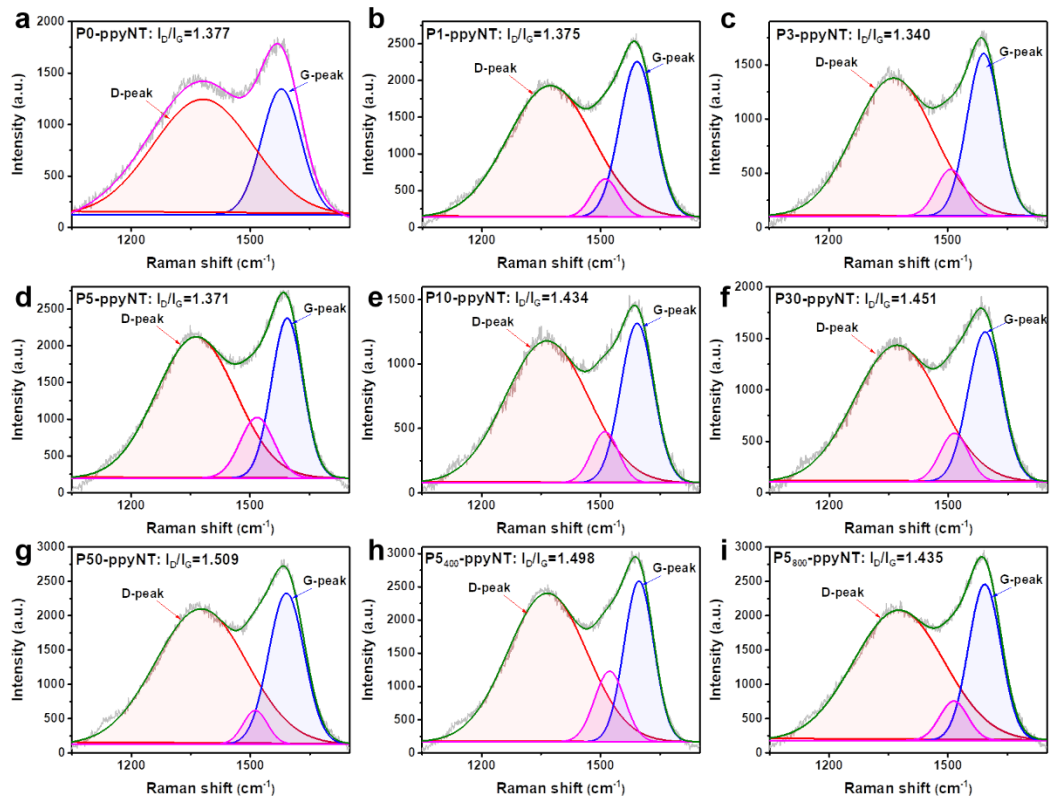

Figure S6. Background-subtracted and deconvoluted Raman spectra of Px-ppyNT samples.



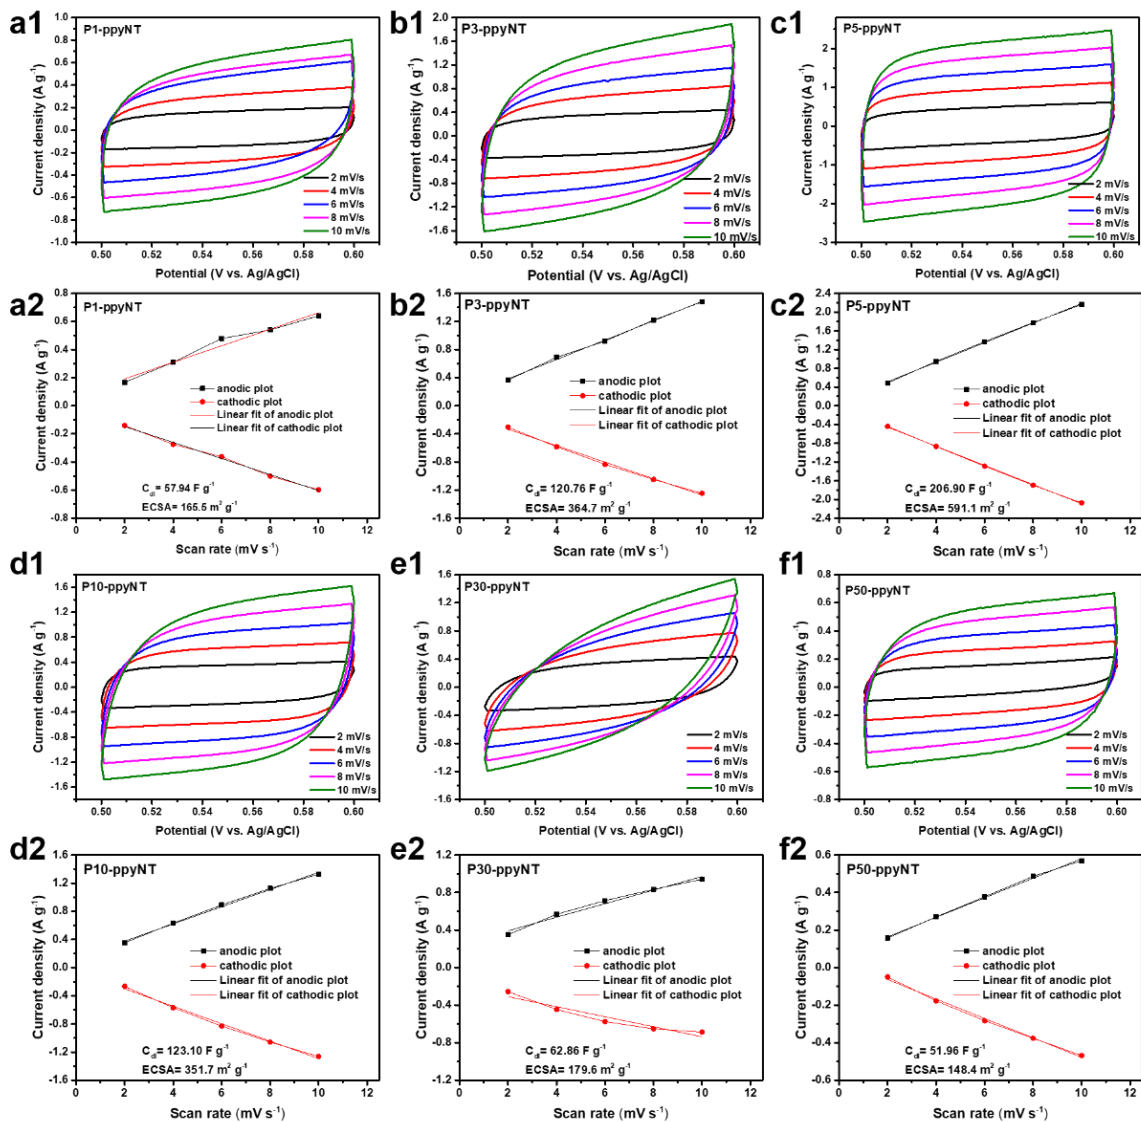

Figure S7. (a1, b1, c1, d1, e1 f1) CV curves at different scan rates and (a2, b2, c2, d2, e2, f2) the cathodic and anodic charging current densities measured at 0.55 V vs Ag/AgCl plotted as a function of scan rate.

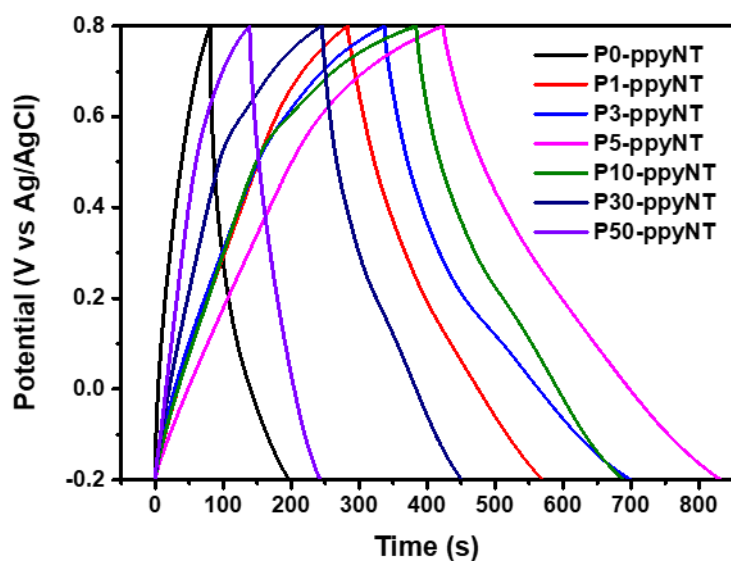

Figure S8. GCD curves of Px-ppyNT at 1 A g<sup>-1</sup>.

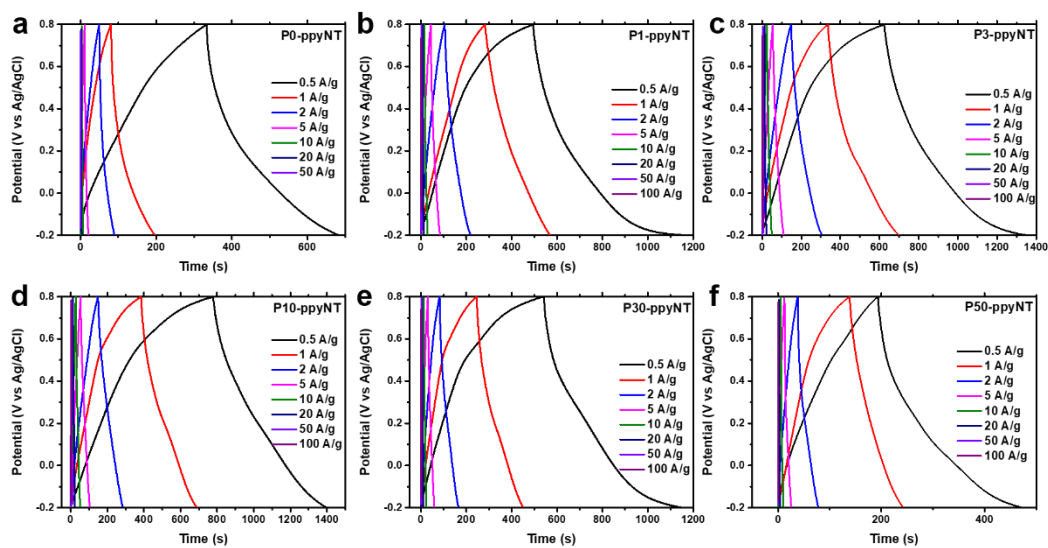

Figure S9. Galvanostatic charge-discharge curves at different current densities of Px-ppyNT samples in a three-electrode system in 1 M H<sub>2</sub>SO<sub>4</sub>.



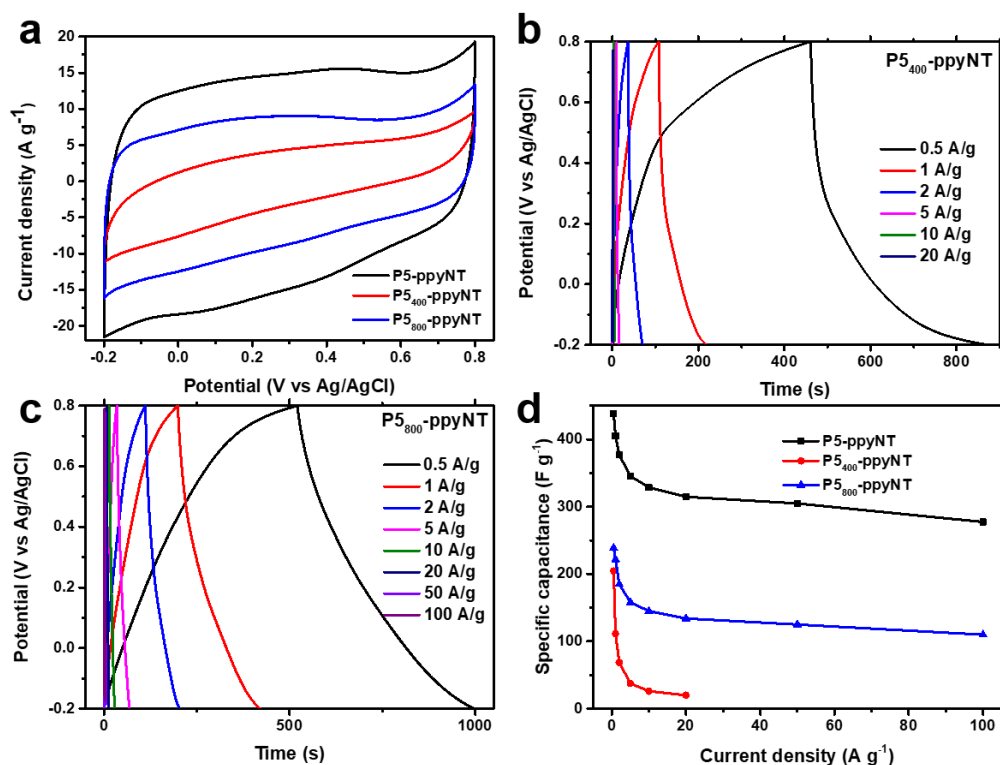

Figure S10. Comparison of electrochemical performance for P5-ppyNT, P5<sub>400</sub>-ppyNT and P5<sub>800</sub>-ppyNT. (a) CV curves at 50 mV s<sup>-1</sup>; GCD curves of (b) P5<sub>400</sub>-ppyNT and (c) P5<sub>800</sub>-ppyNT at different current densities; (d) rate performance in a three-electrode system in 1 M H<sub>2</sub>SO<sub>4</sub>.

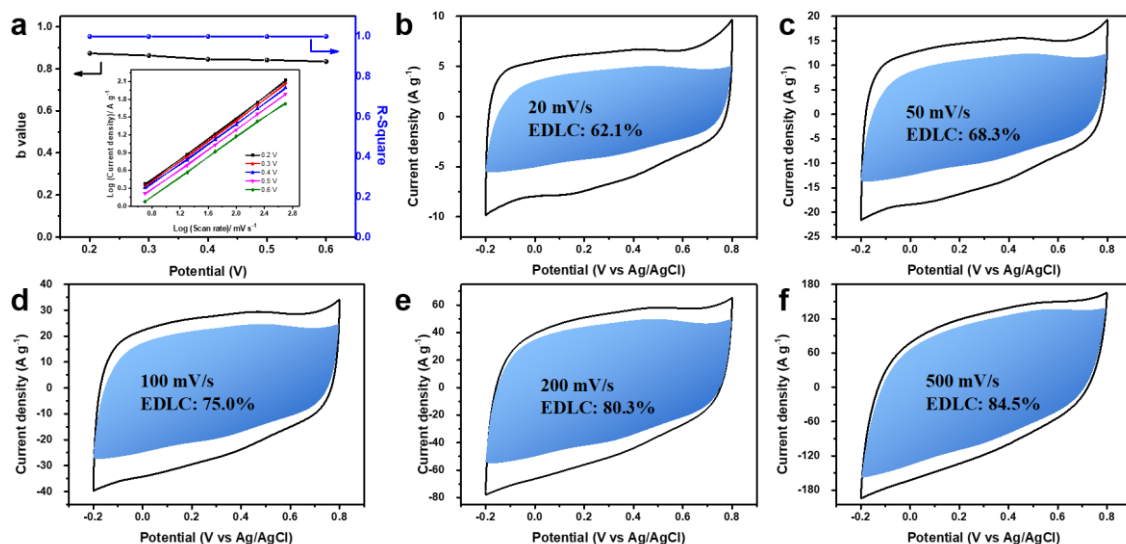

Figure S11. (a) b values against potentials (inset is the plots of current response against scan rate at different potentials); (b)- (f) CV curves of P5-ppyNT with decoupled contribution of EDLC and pseudocapacitive capacitance at different scan rates.

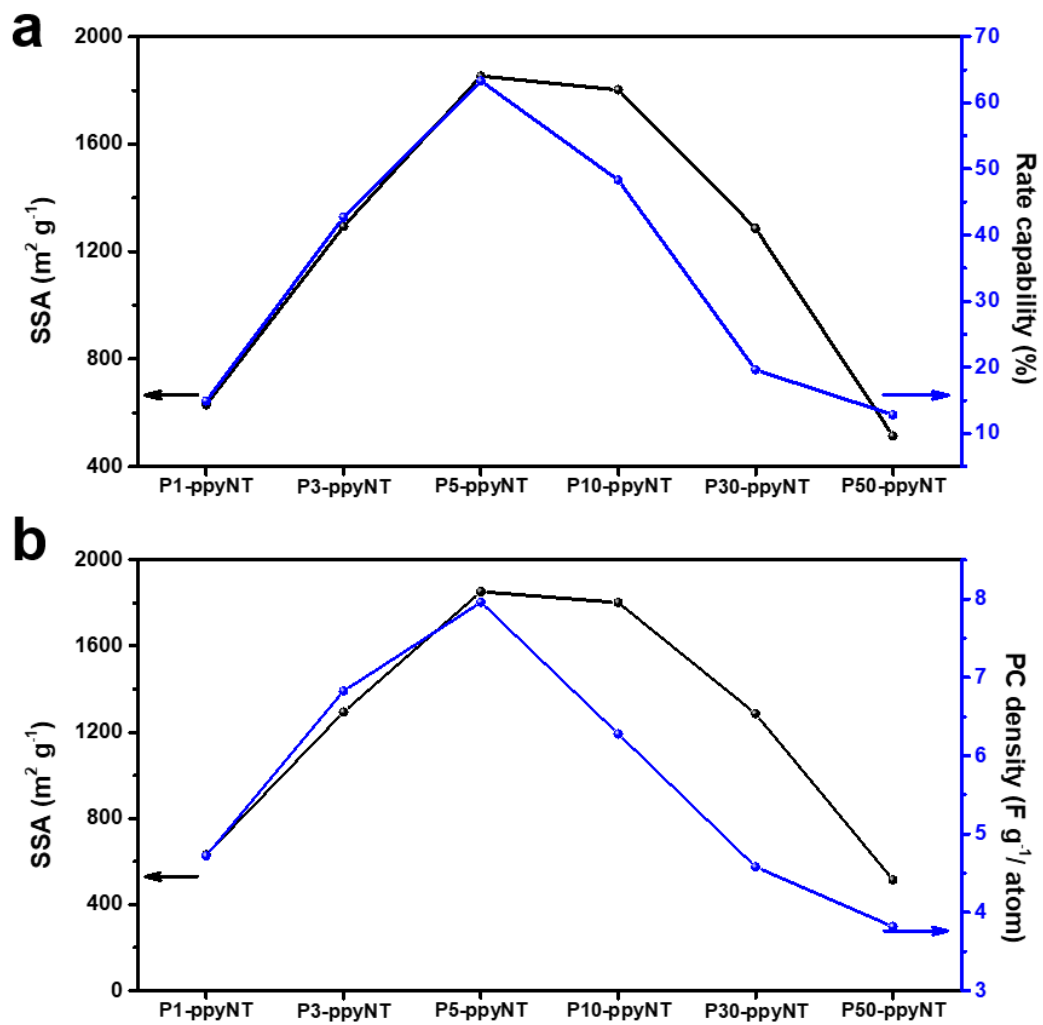

Figure S12. (a) Relationship between the SSA and rate capability; (b) relationship between the SSA and PC density.

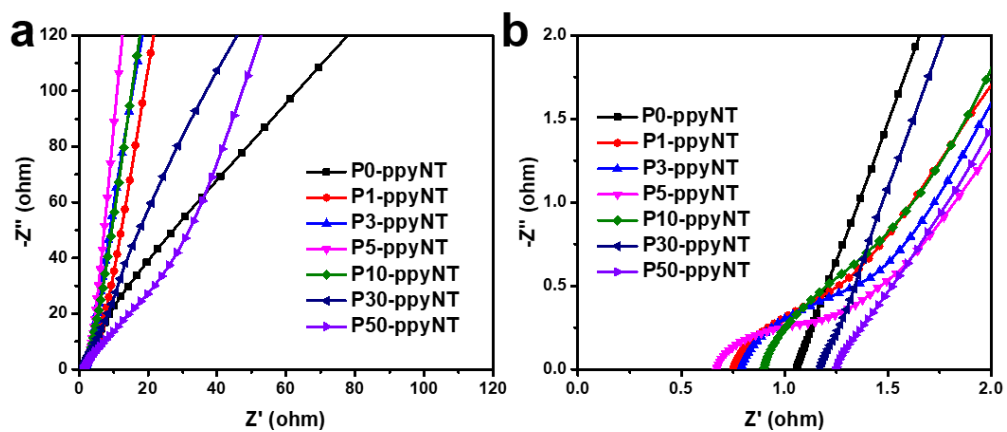

Figure S13. (a) Nyquist plots and (b) the magnified high-frequency region of Px-ppyNT samples.

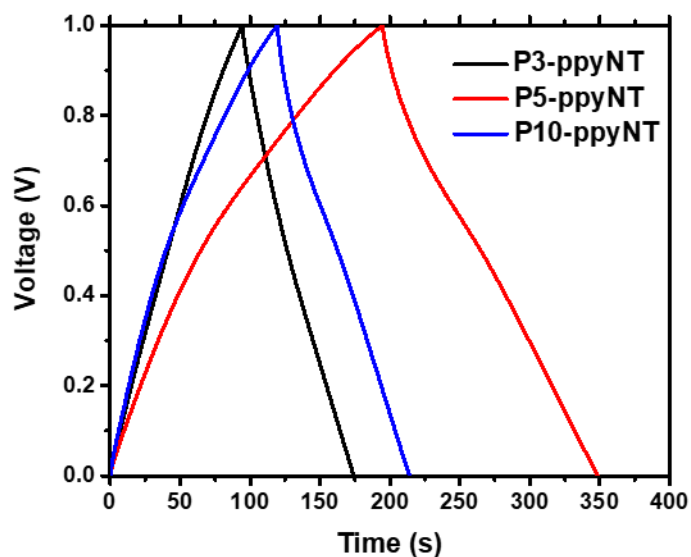

Figure S14. GCD curves of P3-ppyNT, P5-ppyNT and P10-ppyNT in two electrode system at  $1 \text{ A g}^{-1}$  in  $1 \text{ M H}_2\text{SO}_4$ .

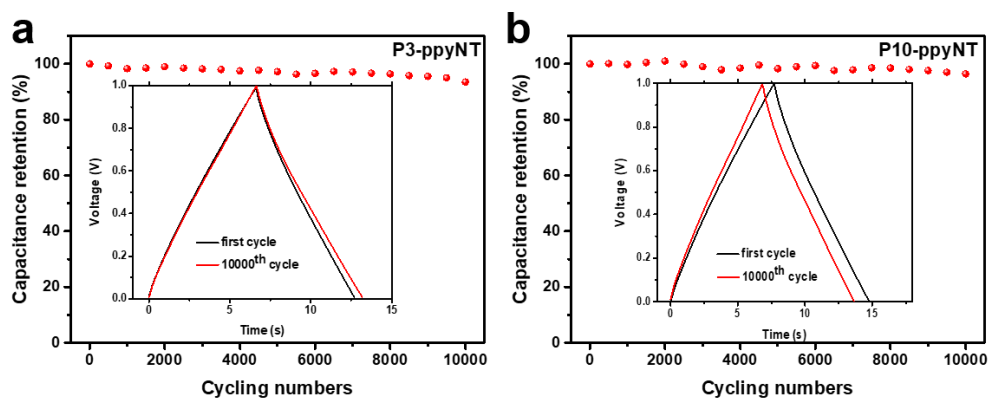

Figure S15. Long-term cycling performance of P3-ppyNT and P10-ppyNT measured at 10 A  $g^{-1}$  over 10000 cycles in two electrode system in 1M  $H_2SO_4$ .

Table S1. Comparison of SSA and specific capacitance of related 1D carbon nanomaterials and P5-ppyNT reported in this work.

| <b>Sample name</b>                                                 | <b>SSA (m<sup>2</sup> g<sup>-1</sup>)</b> | <b>Specific capacitance (F g<sup>-1</sup>)</b> | <b>Reference</b> |
|--------------------------------------------------------------------|-------------------------------------------|------------------------------------------------|------------------|
| 1D hierarchically porous carbon (1D-HPC)                           | 1394                                      | 256.5 (at 5 mV s <sup>-1</sup> )               | [1]              |
| 1D carbon nanobelts (CNB)                                          | 1208                                      | 262 (at 0.5 A g <sup>-1</sup> )                | [2]              |
| Carbon nanorods                                                    | 1,559                                     | 164 (at 10 mV s <sup>-1</sup> ) <sup>a)</sup>  | [3]              |
| Hierarchical porous carbon nanorods (HPCR)                         | 1100.9                                    | 274 (at 0.5 A g <sup>-1</sup> )                | [4]              |
| 1D CNT@micro-C                                                     | 1306                                      | 243 (at 0.5 A g <sup>-1</sup> ) <sup>b)</sup>  | [5]              |
| Mesoporous carbon nanofibers                                       | 1218                                      | 276 (at 0.5 A g <sup>-1</sup> )                | [6]              |
| Nitrogen and fluorine doped mesoporous carbon nanofibers (NFMCNFs) | 596.1                                     | 252.6 (at 0.5 A g <sup>-1</sup> )              | [7]              |
| P5-ppyNT                                                           | 1853                                      | 438 (at 0.5 A g <sup>-1</sup> )                | This work        |

<sup>a, b)</sup>: Tested as two-electrode symmetrical supercapacitor cell.

Table S2. Detailed SSA, pore volume,  $I_D/I_G$  values and ECSA of P<sub>x</sub>-ppyNT samples.

| <b>samples</b>           | <b>S<sub>BET</sub> (m<sup>2</sup> g<sup>-1</sup>)</b> | <b>S<sub>L</sub> (m<sup>2</sup> g<sup>-1</sup>)</b> | <b>Pore volume (cm<sup>3</sup> g<sup>-1</sup>)</b> | <b>I<sub>D</sub>/I<sub>G</sub></b> | <b>ECSA(m<sup>2</sup> g<sup>-1</sup>)</b> |
|--------------------------|-------------------------------------------------------|-----------------------------------------------------|----------------------------------------------------|------------------------------------|-------------------------------------------|
| P0-ppyNT                 | 44                                                    | 61                                                  | 0.06                                               | 1.377                              | --                                        |
| P1-ppyNT                 | 630                                                   | 840                                                 | 0.37                                               | 1.375                              | 165.5                                     |
| P3-ppyNT                 | 1294                                                  | 1723                                                | 0.73                                               | 1.340                              | 364.7                                     |
| P5-ppyNT                 | 1853                                                  | 2563                                                | 1.11                                               | 1.371                              | 591.1                                     |
| P10-ppyNT                | 1802                                                  | 2474                                                | 1.07                                               | 1.434                              | 351.7                                     |
| P30-ppyNT                | 1286                                                  | 1776                                                | 0.78                                               | 1.451                              | 179.6                                     |
| P50-ppyNT                | 514                                                   | 710                                                 | 0.40                                               | 1.509                              | 148.4                                     |
| P5 <sub>400</sub> -ppyNT | 390                                                   | 520                                                 | 0.27                                               | 1.498                              | --                                        |
| P5 <sub>800</sub> -ppyNT | 1004                                                  | 1359                                                | 0.59                                               | 1.435                              | --                                        |



Table S3. Elemental composition of Px-ppyNT samples from XPS results.

| samples                  | Element composition (at.%) |       |        |        |       |
|--------------------------|----------------------------|-------|--------|--------|-------|
|                          | C                          | P     | N      | O      | S     |
| P0-ppyNT                 | 84.291                     | -     | 11.245 | 4.372  | 0.092 |
| P1-ppyNT                 | 81.946                     | 1.386 | 6.298  | 9.965  | 0.404 |
| P3-ppyNT                 | 81.129                     | 2.220 | 6.666  | 9.725  | 0.261 |
| P5-ppyNT                 | 78.732                     | 2.514 | 7.168  | 11.450 | 0.137 |
| P10-ppyNT                | 78.659                     | 2.752 | 5.661  | 12.928 | -     |
| P30-ppyNT                | 76.441                     | 3.374 | 6.873  | 13.312 | -     |
| P50-ppyNT                | 74.581                     | 3.855 | 8.193  | 13.370 | -     |
| P5 <sub>400</sub> -ppyNT | 77.119                     | 2.421 | 6.247  | 13.815 | 0.399 |
| P5 <sub>800</sub> -ppyNT | 82.139                     | 1.455 | 3.249  | 12.887 | 0.270 |

Table S4. Calculated ratio of Nx in Px-ppyNT samples.

| samples                  | Ratio of Nx (%) |       |       |       |
|--------------------------|-----------------|-------|-------|-------|
|                          | Ni              | Nii   | Niii  | Niv   |
| P0-ppyNT                 | 37.27           | 31.00 | 21.23 | 10.49 |
| P1-ppyNT                 | 25.79           | 31.77 | 29.80 | 12.64 |
| P3-ppyNT                 | 27.91           | 31.97 | 26.93 | 13.20 |
| P5-ppyNT                 | 27.71           | 32.55 | 27.96 | 11.79 |
| P10-ppyNT                | 25.20           | 33.45 | 25.43 | 15.91 |
| P30-ppyNT                | 29.08           | 36.52 | 23.37 | 11.02 |
| P50-ppyNT                | 28.27           | 35.21 | 25.35 | 11.17 |
| P5 <sub>400</sub> -ppyNT | 26.84           | 45.65 | 20.55 | 6.96  |
| P5 <sub>800</sub> -ppyNT | 21.02           | 45.61 | 27.45 | 5.92  |

Table S5. Calculated ratio of P species in Px-ppyNT samples.

| samples                  | Ratio of P species (%) |             |             |
|--------------------------|------------------------|-------------|-------------|
|                          | P 1 (C 3 -P=O)         | P 2 (C-P-O) | P 3 (C-O-P) |
| P1-ppyNT                 | 30.30                  | 38.78       | 30.92       |
| P3-ppyNT                 | 28.83                  | 41.24       | 29.93       |
| P5-ppyNT                 | 33.20                  | 39.73       | 27.07       |
| P10-ppyNT                | 35.09                  | 38.27       | 26.64       |
| P30-ppyNT                | 36.83                  | 37.64       | 25.53       |
| P50-ppyNT                | 33.05                  | 40.93       | 26.02       |
| P5 <sub>400</sub> -ppyNT | 28.54                  | 42.23       | 29.23       |
| P5 <sub>800</sub> -ppyNT | 44.90                  | 21.58       | 33.52       |

Table S6. Calculated rate capability, PC density and heteroatom ratio of Px-ppyNT.

| Samples   | Rate capability (%) | PC density (F g <sup>-1</sup> atom <sup>-1</sup> ) | Heteroatom ratio (at%) |
|-----------|---------------------|----------------------------------------------------|------------------------|
| P1-ppyNT  | 14.9                | 4.72                                               | 18.054                 |
| P3-ppyNT  | 42.7                | 6.82                                               | 19.871                 |
| P5-ppyNT  | 63.3                | 7.96                                               | 21.268                 |
| P10-ppyNT | 48.3                | 6.28                                               | 21.341                 |
| P30-ppyNT | 19.6                | 4.58                                               | 23.559                 |
| P50-ppyNT | 12.8                | 3.82                                               | 25.419                 |

## References

- [1] Liang, C.; Bao, J.; Li, C.; Huang, H.; Chen, C.; Lou, Y.; Lu, H.; Lin, H.; Shi, Z.; Feng, S. One-dimensional hierarchically porous carbon from biomass with high capacitance as supercapacitor materials. *Micropor. Mesopor. Mat.* **2017**, *251*, 77-82.
- [2] Ouyang, T.; Cheng, K.; Yang, F.; Zhou, L.; Zhu, K.; Ye, K.; Wang, G.; Cao, D. From biomass with irregular structures to 1D carbon nanobelts: a stripping and cutting strategy to fabricate high performance supercapacitor materials. *J. Mater. Chem. A* **2017**, *5*, 14551-14561.
- [3] Pachfule, P.; Shinde, D.; Majumder, M.; Xu, Q. Fabrication of carbon nanorods and graphene nanoribbons from a metal-organic framework. *Nat. Chem.* **2016**, *8*, 718-724.
- [4] Fang, L.; Xie, Y.; Wang, Y.; Zhang, Z.; Liu, P.; Cheng, N.; Liu, J.; Tu, Y.; Zhao, H.; Zhang, J. Facile synthesis of hierarchical porous carbon nanorods for supercapacitors application. *Appl. Surf. Sci.* **2019**, *464*, 479-487.
- [5] Li, Z.; Li, L.; Li, C.; Zhong, W.; Zhang, H. Construction of Hierarchically One-Dimensional Core-Shell CNT@Microporous Carbon by Covalent Bond-Induced Surface-Confined Cross-Linking for High-Performance Supercapacitor. *ACS Appl. Mater. Interfaces* **2017**, *9*, 15557-15565.
- [6] Zhang, X.-Q.; Sun, Q.; Dong, W.; Li, D.; Lu, A.-H.; Mu, J.-Q.; Li, W.-C. Synthesis of superior carbon nanofibers with large aspect ratio and tunable porosity for electrochemical energy storage. *J. Mater. Chem. A* **2013**, *1*, 9449-9455.
- [7] Na, W.; Jun, J.; Park, J. W.; Lee, G.; Jang, J. Highly porous carbon nanofibers co-doped with fluorine and nitrogen for outstanding supercapacitor performance. *J. Mater. Chem. A* **2017**, *5*, 17379-17387.
